# Supplementary material for: Development and Preclinical Evaluation of [68Ga]BMSH as a New Potent Positron Emission Tomography Tracer for Imaging Programmed Death-Ligand 1 Expression
Source: MDPI journal article supplement (doi:10.3390/ph16101487), 2023-10-19
Supplement: s1 [file s1]

## Supplemental Information

*Article*

# Development and Preclinical Evaluation of [<sup>68</sup>Ga]BMSH as a New Potent Positron Emission Tomography Tracer for Imaging Programmed Death-Ligand 1 Expression

Yong Huang <sup>1,†</sup>, Chengze Li <sup>1,†</sup>, Zhongjing Li <sup>1</sup>, Qiong Wang <sup>1</sup>, Size Huang <sup>1</sup>, Qi Liu <sup>2,3,\*</sup> and Ying Liang <sup>1,\*</sup>

<sup>1</sup> Department of Nuclear Medicine, National Cancer Center, National Clinical Research Center for Cancer, Cancer Hospital & Shenzhen Hospital, Chinese Academy of Medical Sciences and Peking Union Medical College, Shenzhen 518116, China

<sup>2</sup> International Cancer Center, Shenzhen University School of Medicine, Shenzhen University, Shenzhen 518057, China

<sup>3</sup> Institute of Biomedical Engineering, Shenzhen Graduate School, Peking University, Shenzhen 518055, China

\* Correspondence: liu\_qi@szu.edu.cn (Q.L.); liangy\_2000@sina.com (Y.L.)

† These authors contributed equally to this work.

## 1. Characterization.

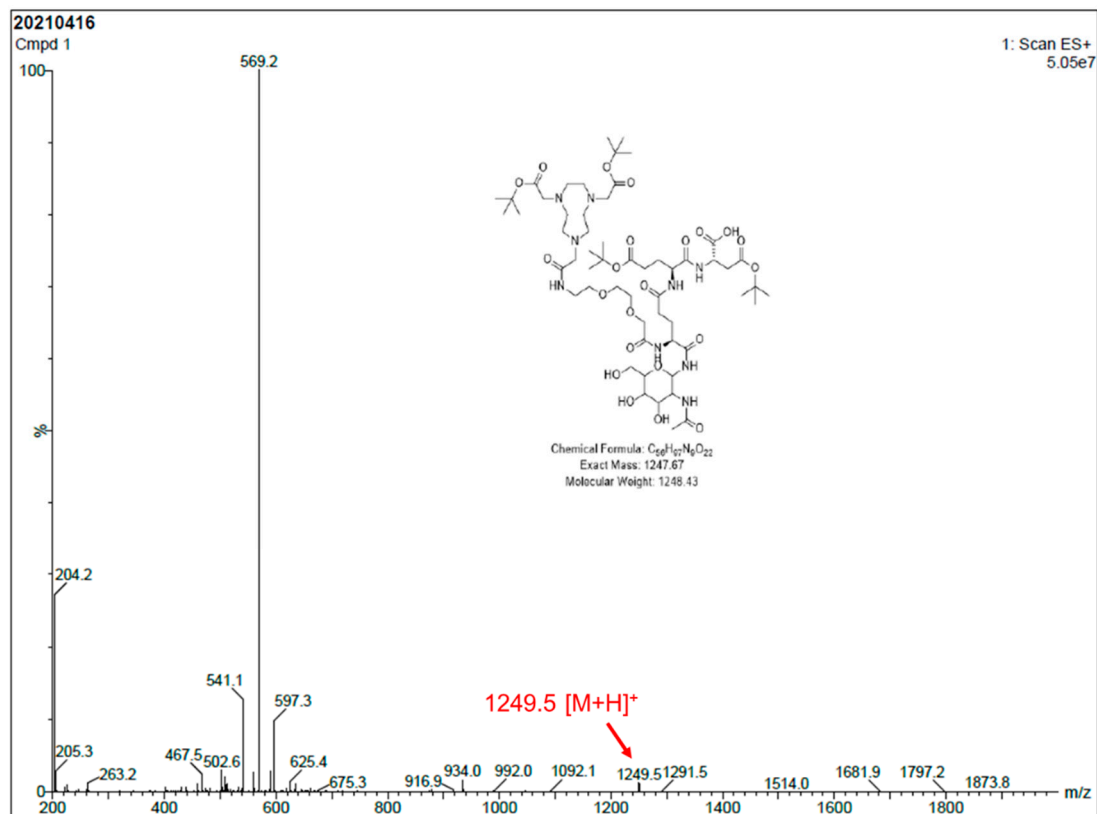

Figure S1. ESI-MS spectrum of compound 1.

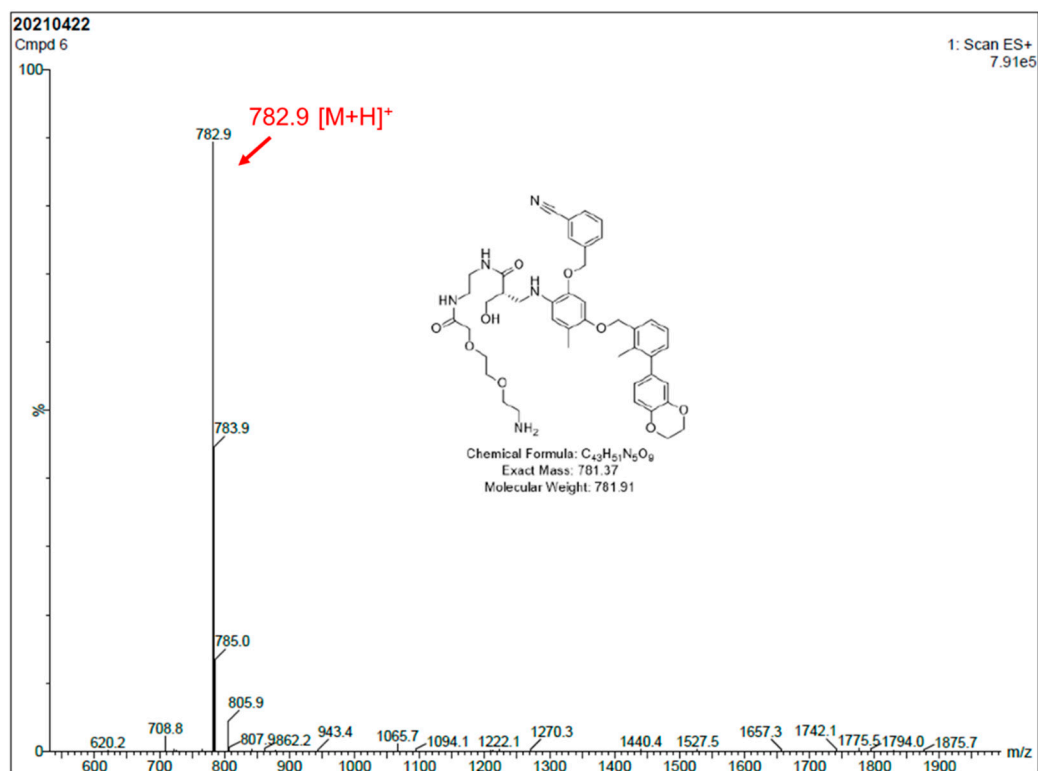

Figure S2. ESI-MS spectrum of compound 6.

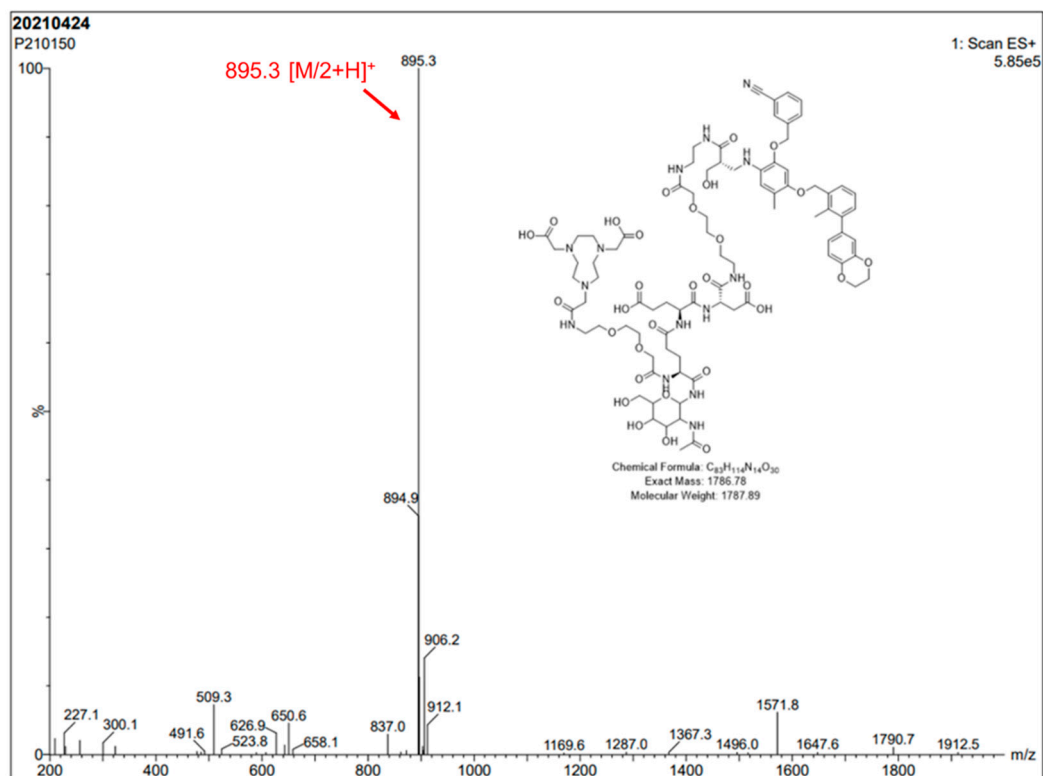

**Figure S3.** ESI-MS spectrum of NOTA-BMSH

## 2. Cell study

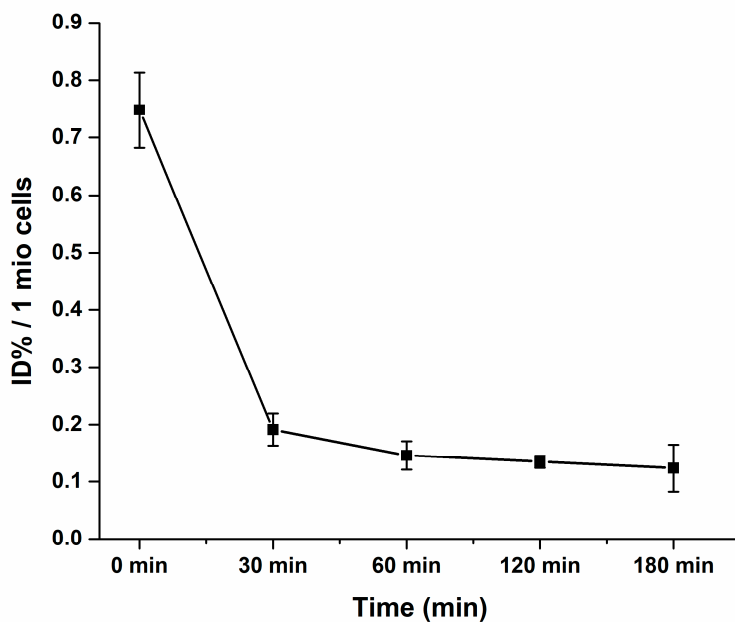

**Figure S4.** Efflux kinetics of [<sup>68</sup>Ga]BMSH after incubation of A549-hPDL1 cells with radiolabeled compounds for 60 min followed by incubation with a compound-free medium for 0–180 min.

### 3. Estimated human dosimetry of [ $^{68}\text{Ga}$ ]BMSH.

Table S1. Estimated human dosimetry data of [ $^{68}\text{Ga}$ ]BMSH in mSv/MBq(male).

| Target Organ         | Total    | EDE Cont. | ED Cont. |
|----------------------|----------|-----------|----------|
| Adrenals             | 1.36E-02 | 0.00E00   | 1.26E-04 |
| Brain                | 1.48E-03 | 0.00E00   | 1.48E-05 |
| Esophagus            | 3.34E-03 | 0.00E00   | 1.34E-04 |
| Eyes                 | 1.97E-04 | 0.00E00   | 0.00E00  |
| Gallbladder Wall     | 3.65E-03 | 0.00E00   | 3.37E-05 |
| Left colon           | 2.39E-03 | 0.00E00   | 1.16E-04 |
| Small Intestine      | 1.93E-02 | 1.16E-03  | 1.78E-04 |
| Stomach Wall         | 3.37E-03 | 0.00E00   | 4.05E-04 |
| Right colon          | 1.70E-03 | 0.00E00   | 8.22E-05 |
| Rectum               | 6.02E-04 | 0.00E00   | 1.39E-05 |
| Heart Wall           | 2.53E-02 | 1.52E-03  | 2.33E-04 |
| Kidneys              | 1.22E-01 | 7.31E-03  | 1.12E-03 |
| Liver                | 1.75E-02 | 1.05E-03  | 6.99E-04 |
| Lungs                | 3.52E-02 | 4.23E-03  | 4.23E-03 |
| Pancreas             | 2.97E-03 | 0.00E00   | 2.74E-05 |
| Prostate             | 5.35E-04 | 0.00E00   | 2.47E-06 |
| Salivary Glands      | 2.74E-04 | 0.00E00   | 2.74E-06 |
| Red Marrow           | 3.43E-03 | 4.12E-04  | 4.12E-04 |
| Osteogenic Cells     | 3.26E-03 | 9.79E-05  | 3.26E-05 |
| Spleen               | 8.45E-02 | 5.07E-03  | 7.80E-04 |
| Testes               | 7.35E-05 | 1.84E-05  | 2.94E-06 |
| Thymus               | 3.03E-03 | 0.00E00   | 2.79E-05 |
| Thyroid              | 1.39E-03 | 4.17E-05  | 5.55E-05 |
| Urinary Bladder Wall | 2.92E-04 | 0.00E00   | 1.17E-05 |
| Total Body           | 2.71E-03 | 0.00E00   | 0.00E00  |
| Effective Dose       |          | 2.09E-02  | 8.74E-03 |
